# Supplementary material for: Role of cation choice in the radiation tolerance of pyrochlores
Source: Royal Society of Chemistry journal article supplement (doi:10.1039/c2ra22745b), 2012-12-21
Supplement: c2ra22745b.pdf [file c2ra22745b.pdf]

## RSC Advances (Electronic Supplementary Information)

### Role of cation choice in the radiation tolerance of pyrochlores

Ram Devanathan,\*<sup>a</sup> Fei Gao<sup>a</sup> and Christina J. Sundgren<sup>a</sup>

<sup>a</sup>Chemical & Materials Sciences Division, MS K2-01

Pacific Northwest National Laboratory, Richland, WA 99352 USA.

Fax: 509-371-6242; Tel: 509-371-6487; E-mail: [ram.devanathan@pnnl.gov](mailto:ram.devanathan@pnnl.gov)

Table I. Number of Gd bond defects for radial distance (in the X-Y plane) less than 2 nm, between 2 and 2.8 nm, and beyond 2.8 nm from the center of the thermal spike.

| Composition                                                        | r < 2 nm | 2 nm < r < 2.8 nm | r > 2.8 nm |
|--------------------------------------------------------------------|----------|-------------------|------------|
| Gd <sub>2</sub> Zr <sub>2</sub> O <sub>7</sub>                     | 1580     | 1273              | 181        |
| Gd <sub>2</sub> Ti <sub>0.5</sub> Zr <sub>1.5</sub> O <sub>7</sub> | 1587     | 1048              | 117        |
| Gd <sub>2</sub> TiZrO <sub>7</sub>                                 | 1574     | 789               | 53         |
| Gd <sub>2</sub> Ti <sub>1.5</sub> Zr <sub>0.5</sub> O <sub>7</sub> | 1657     | 518               | 21         |
| Gd <sub>2</sub> Ti <sub>2</sub> O <sub>7</sub>                     | 1710     | 234               | 1          |

Table II. Number of B site (Zr or Ti) bond defects for radial distance (in the X-Y plane) less than 2 nm, between 2 and 2.8 nm, and beyond 2.8 nm from the center of the thermal spike.

| Composition                                                        | r < 2 nm | 2 nm < r < 2.8 nm | r > 2.8 nm |
|--------------------------------------------------------------------|----------|-------------------|------------|
| Gd <sub>2</sub> Zr <sub>2</sub> O <sub>7</sub>                     | 1501     | 1188              | 173        |
| Gd <sub>2</sub> Ti <sub>0.5</sub> Zr <sub>1.5</sub> O <sub>7</sub> | 1351     | 912               | 125        |
| Gd <sub>2</sub> TiZrO <sub>7</sub>                                 | 1242     | 645               | 27         |
| Gd <sub>2</sub> Ti <sub>1.5</sub> Zr <sub>0.5</sub> O <sub>7</sub> | 913      | 425               | 18         |
| Gd <sub>2</sub> Ti <sub>2</sub> O <sub>7</sub>                     | 903      | 179               | 20         |

Table III. Number of O bond defects for radial distance (in the X-Y plane) less than 2 nm, between 2 and 2.8 nm, and beyond 2.8 nm from the center of the thermal spike.

| Composition                                                        | $r < 2$ nm | $2 \text{ nm} < r < 2.8$ nm | $r > 2.8$ nm |
|--------------------------------------------------------------------|------------|-----------------------------|--------------|
| Gd <sub>2</sub> Zr <sub>2</sub> O <sub>7</sub>                     | 644        | 381                         | 86           |
| Gd <sub>2</sub> Ti <sub>0.5</sub> Zr <sub>1.5</sub> O <sub>7</sub> | 978        | 513                         | 65           |
| Gd <sub>2</sub> TiZrO <sub>7</sub>                                 | 1515       | 501                         | 53           |
| Gd <sub>2</sub> Ti <sub>1.5</sub> Zr <sub>0.5</sub> O <sub>7</sub> | 2446       | 461                         | 18           |
| Gd <sub>2</sub> Ti <sub>2</sub> O <sub>7</sub>                     | 2723       | 254                         | 2            |

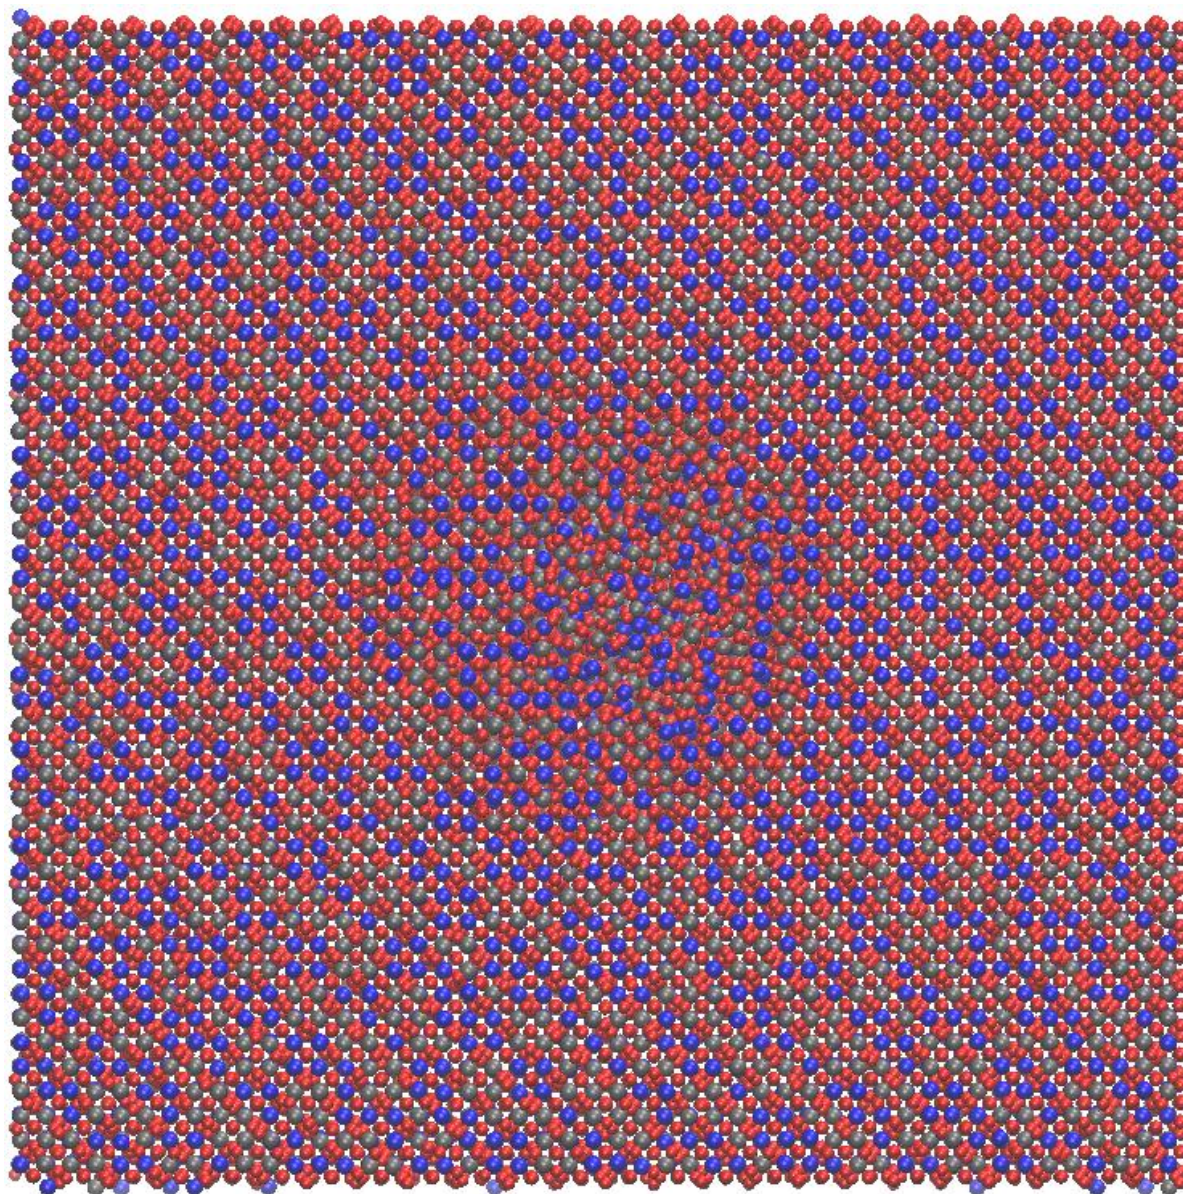

**Fig. S1** Projection of atom positions in  $\text{Gd}_2\text{Ti}_{1.5}\text{Zr}_{0.5}\text{O}_7$  at  $\sim 50$  ps after a 12 keV/nm thermal spike. The side length is  $\sim 12.5$  nm. Gd is shown as a blue sphere, Zr and Ti as grey spheres, and O as a red sphere.



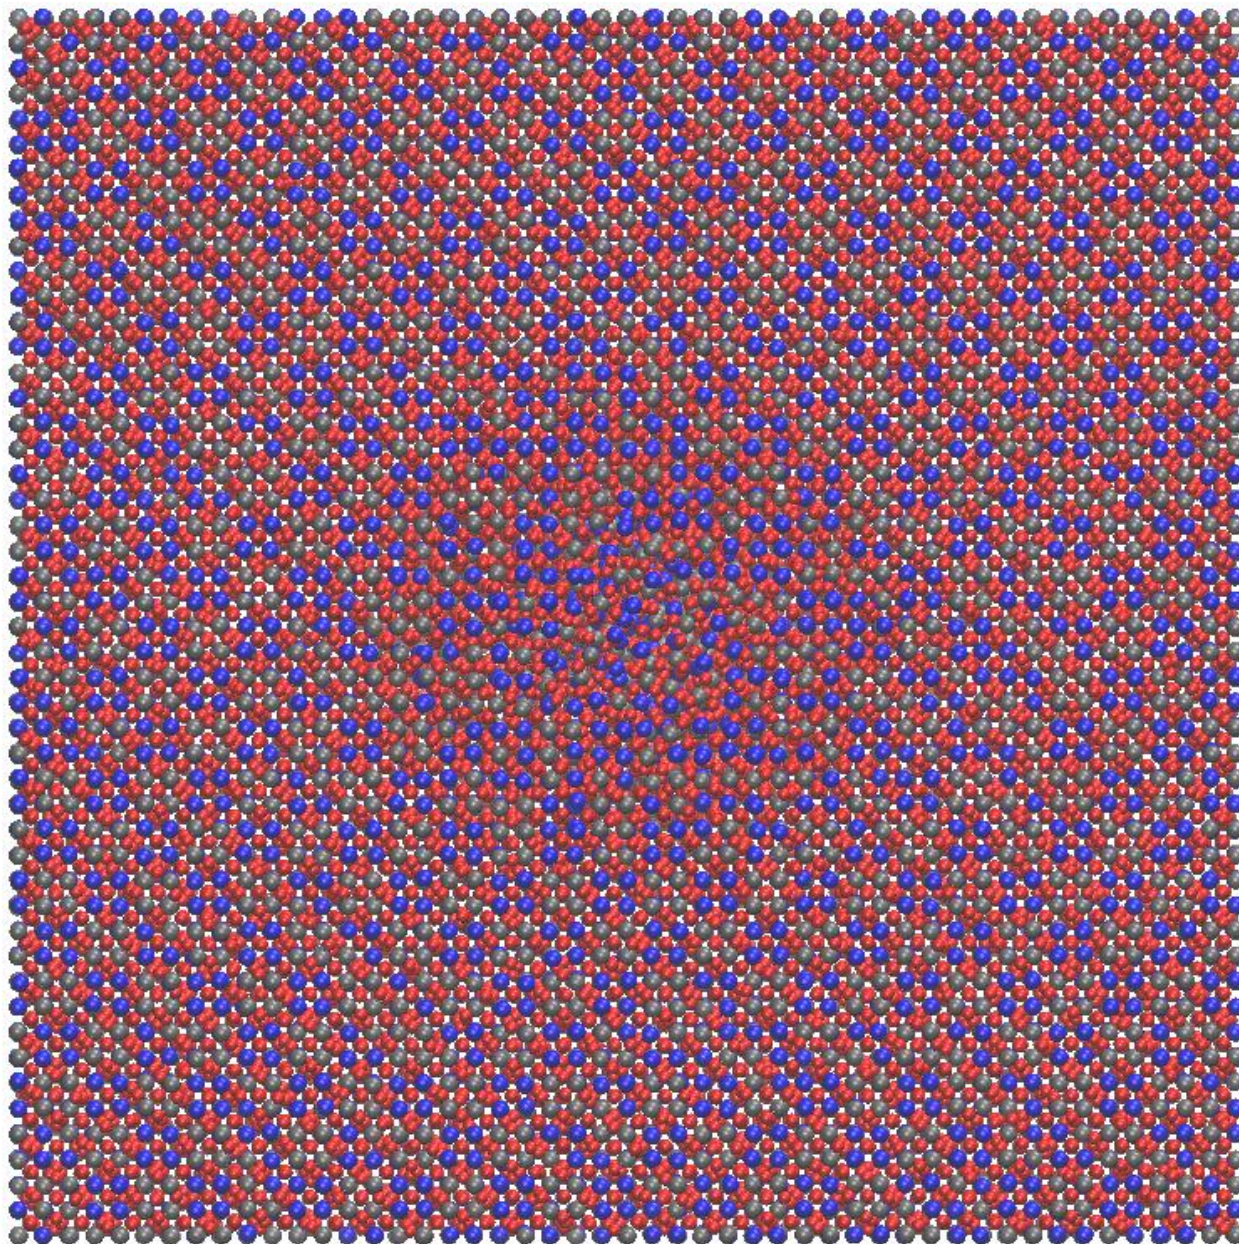

**Fig. S2** Projection of atom positions in  $\text{Gd}_2\text{TiZrO}_7$  at  $\sim 50$  ps after a  $12 \text{ keV/nm}$  thermal spike. The side length is  $\sim 12.5 \text{ nm}$ . Gd is shown as a blue sphere, Zr and Ti as grey spheres, and O as a red sphere.



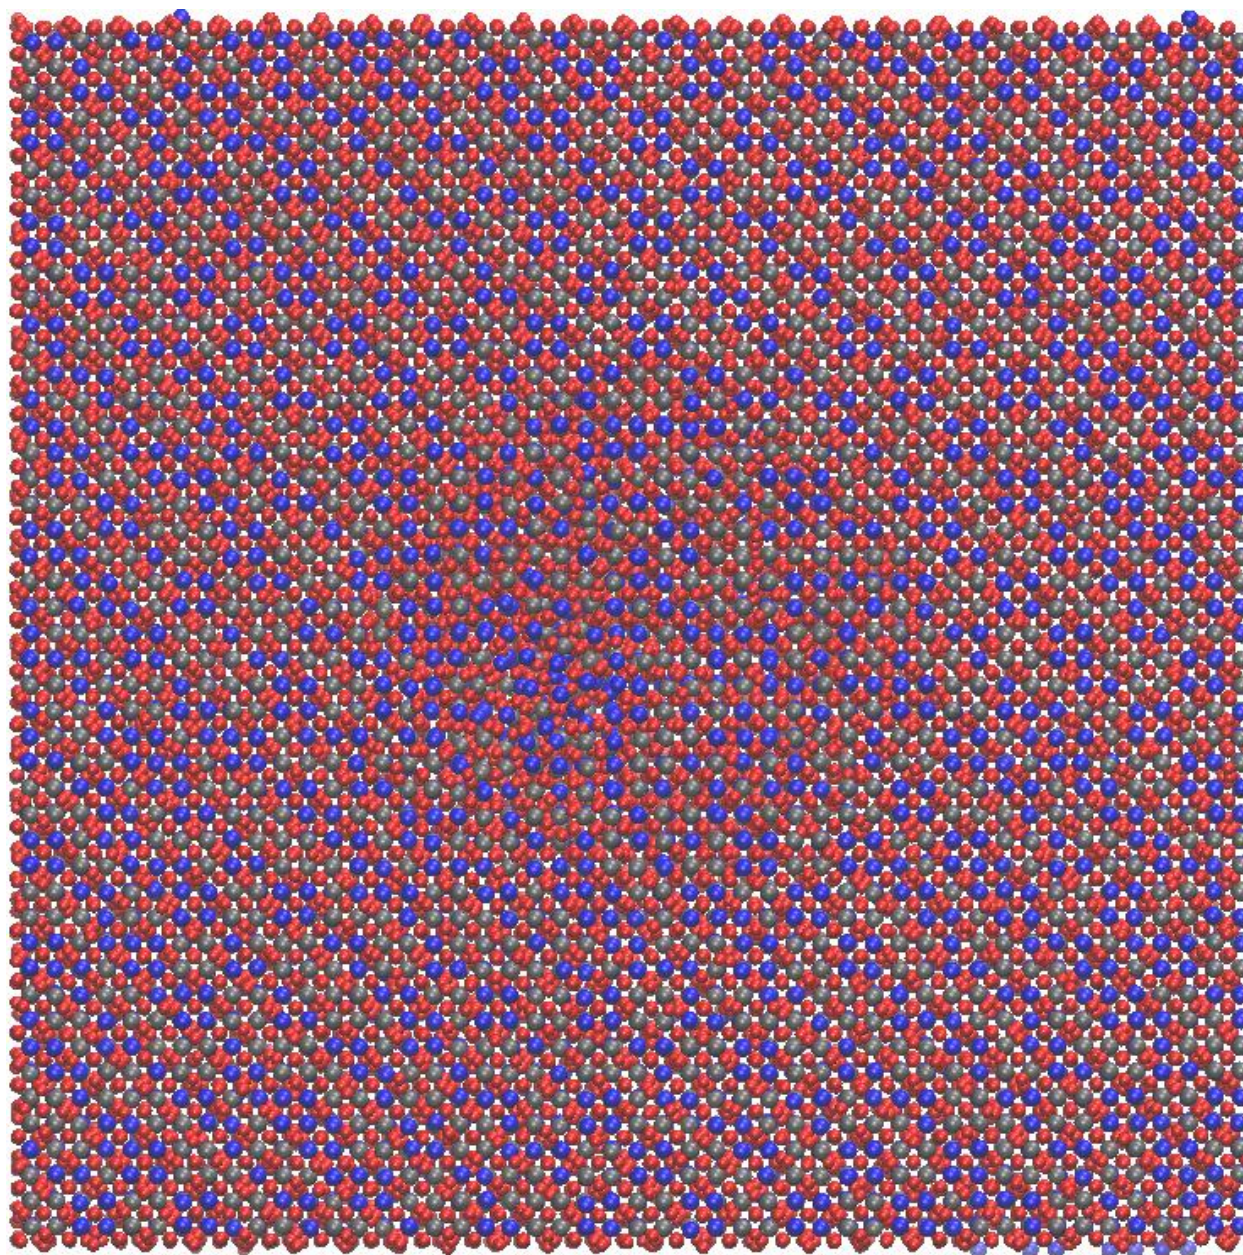

**Fig. S3** Projection of atom positions in  $\text{Gd}_2\text{Ti}_{0.5}\text{Zr}_{1.5}\text{O}_7$  at  $\sim 50$  ps after a 12 keV/nm thermal spike. The side length is  $\sim 12.5$  nm. Gd is shown as a blue sphere, Zr and Ti as grey spheres, and O as a red sphere.

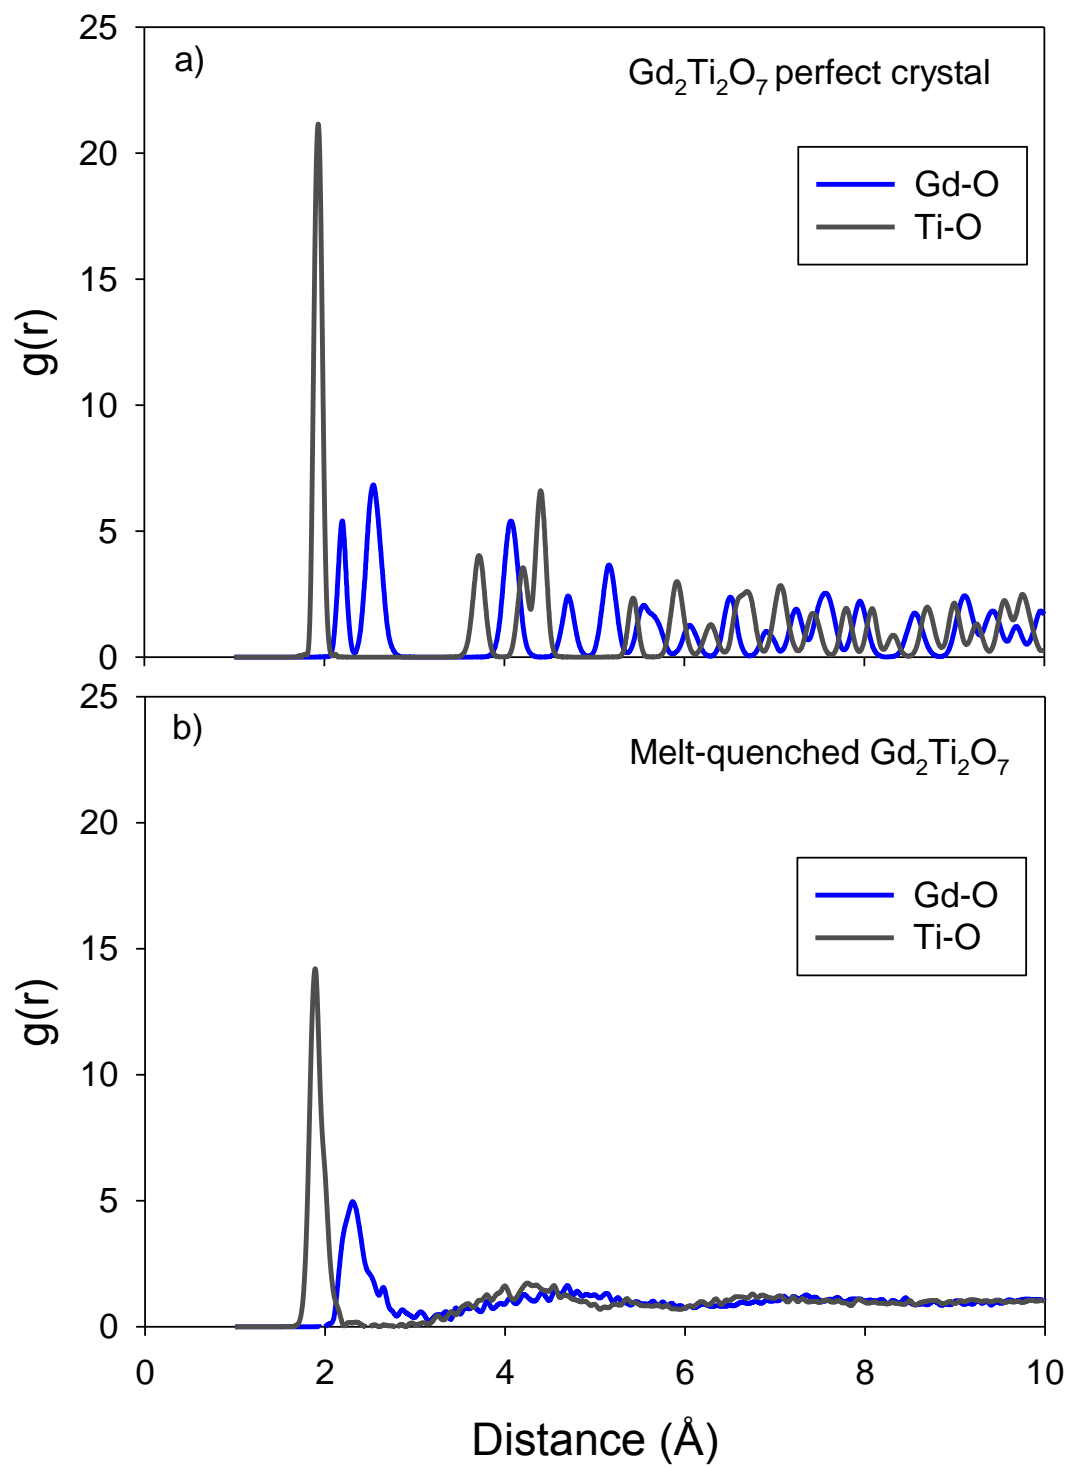

**Fig. S4** Radial distribution functions of Gd-O and Ti-O pairs in a) perfectly crystalline and b) melt-quenched amorphous Gd<sub>2</sub>Ti<sub>2</sub>O<sub>7</sub> at 300 K.

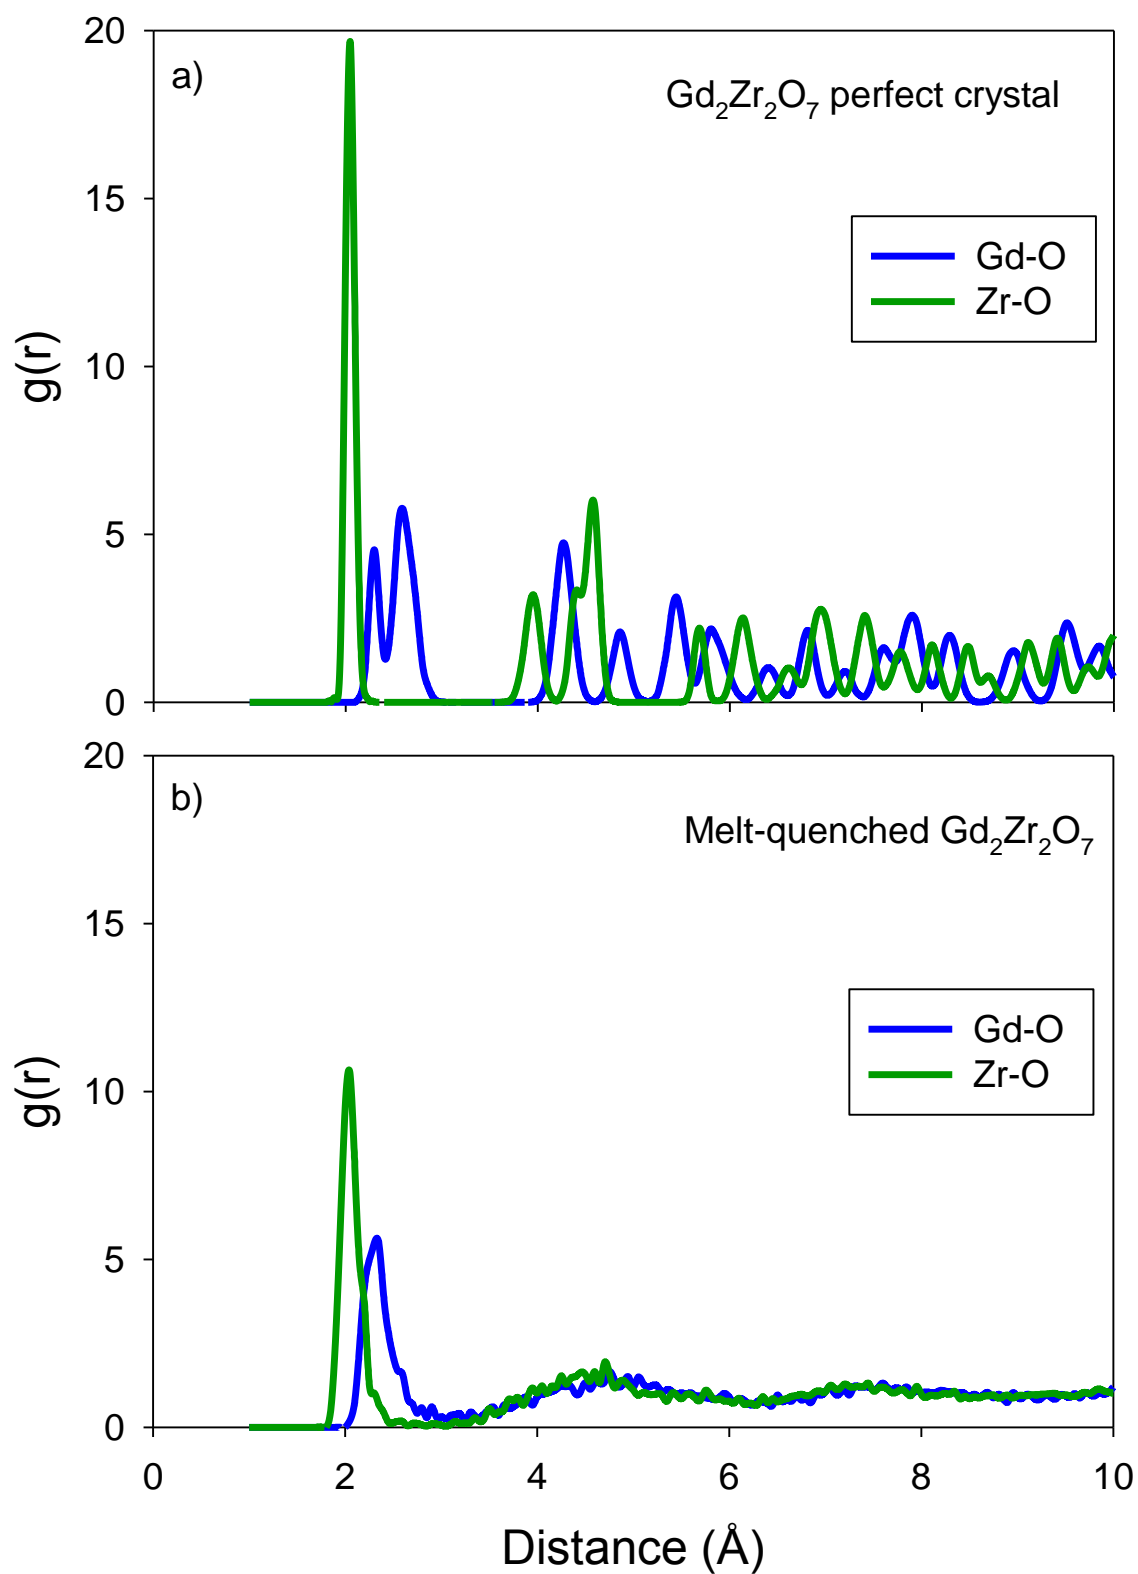

**Fig. S5** Radial distribution functions of Gd-O and Zr-O pairs in a) perfectly crystalline and b) melt-quenched amorphous Gd<sub>2</sub>Zr<sub>2</sub>O<sub>7</sub> at 300 K.

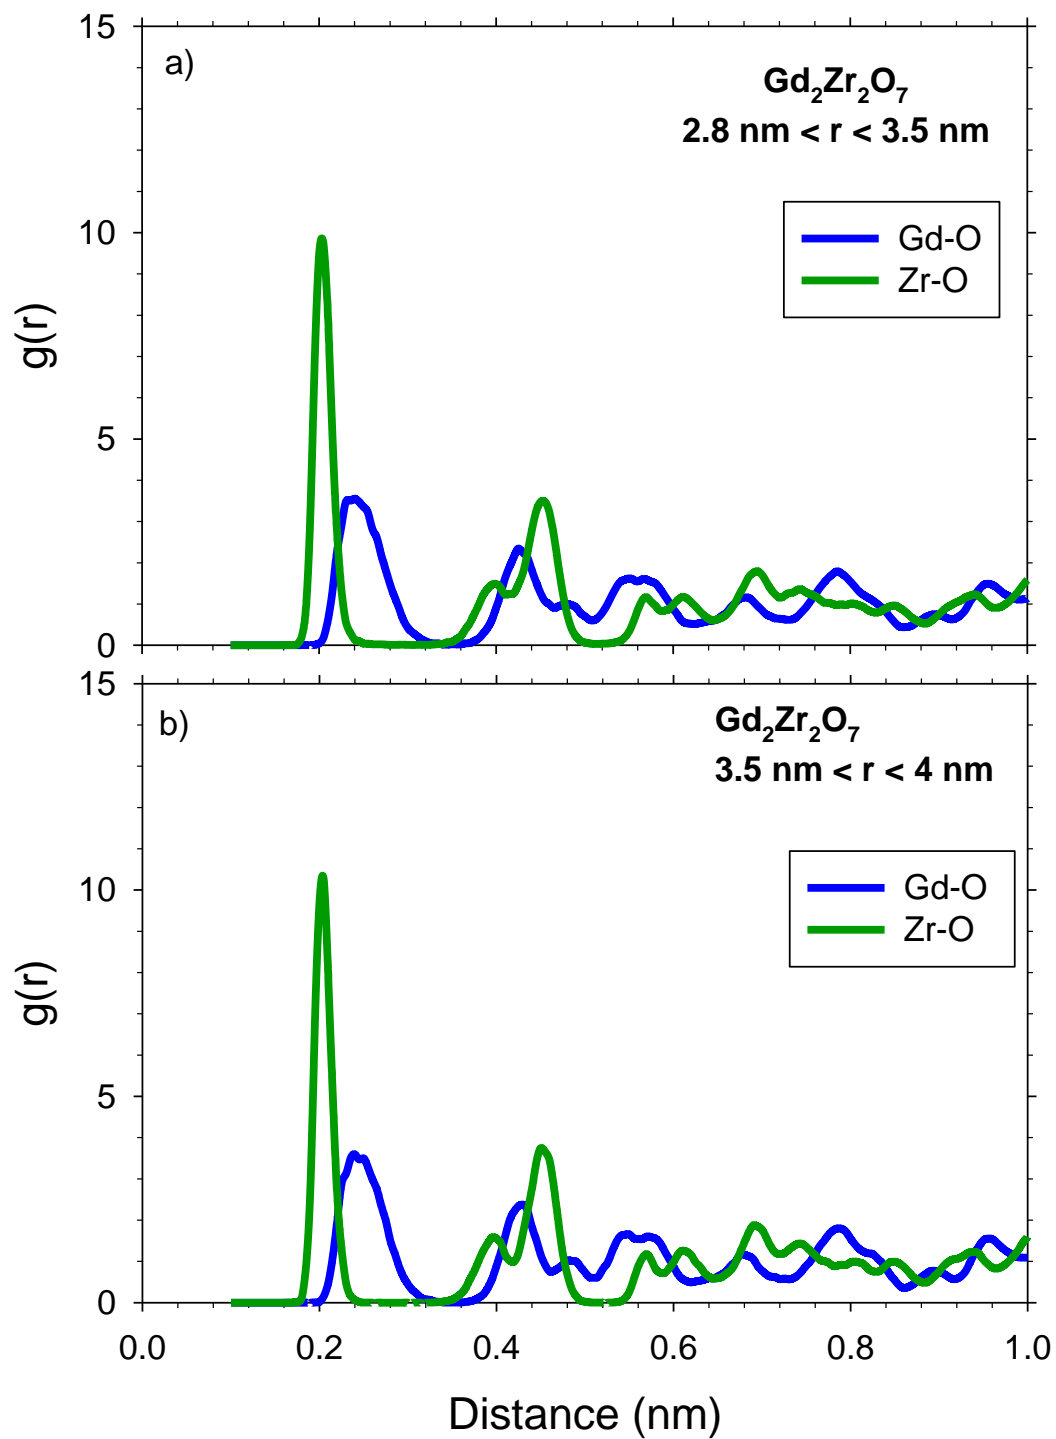

**Fig. S6** Radial distribution functions of Gd-O and Zr-O pairs in annular cylinders centered on a 12 keV/nm thermal spike with a) radius between 2.8 and 3.5 nm; and b) radius between 3.5 and 4 nm in  $\text{Gd}_2\text{Zr}_2\text{O}_7$ .



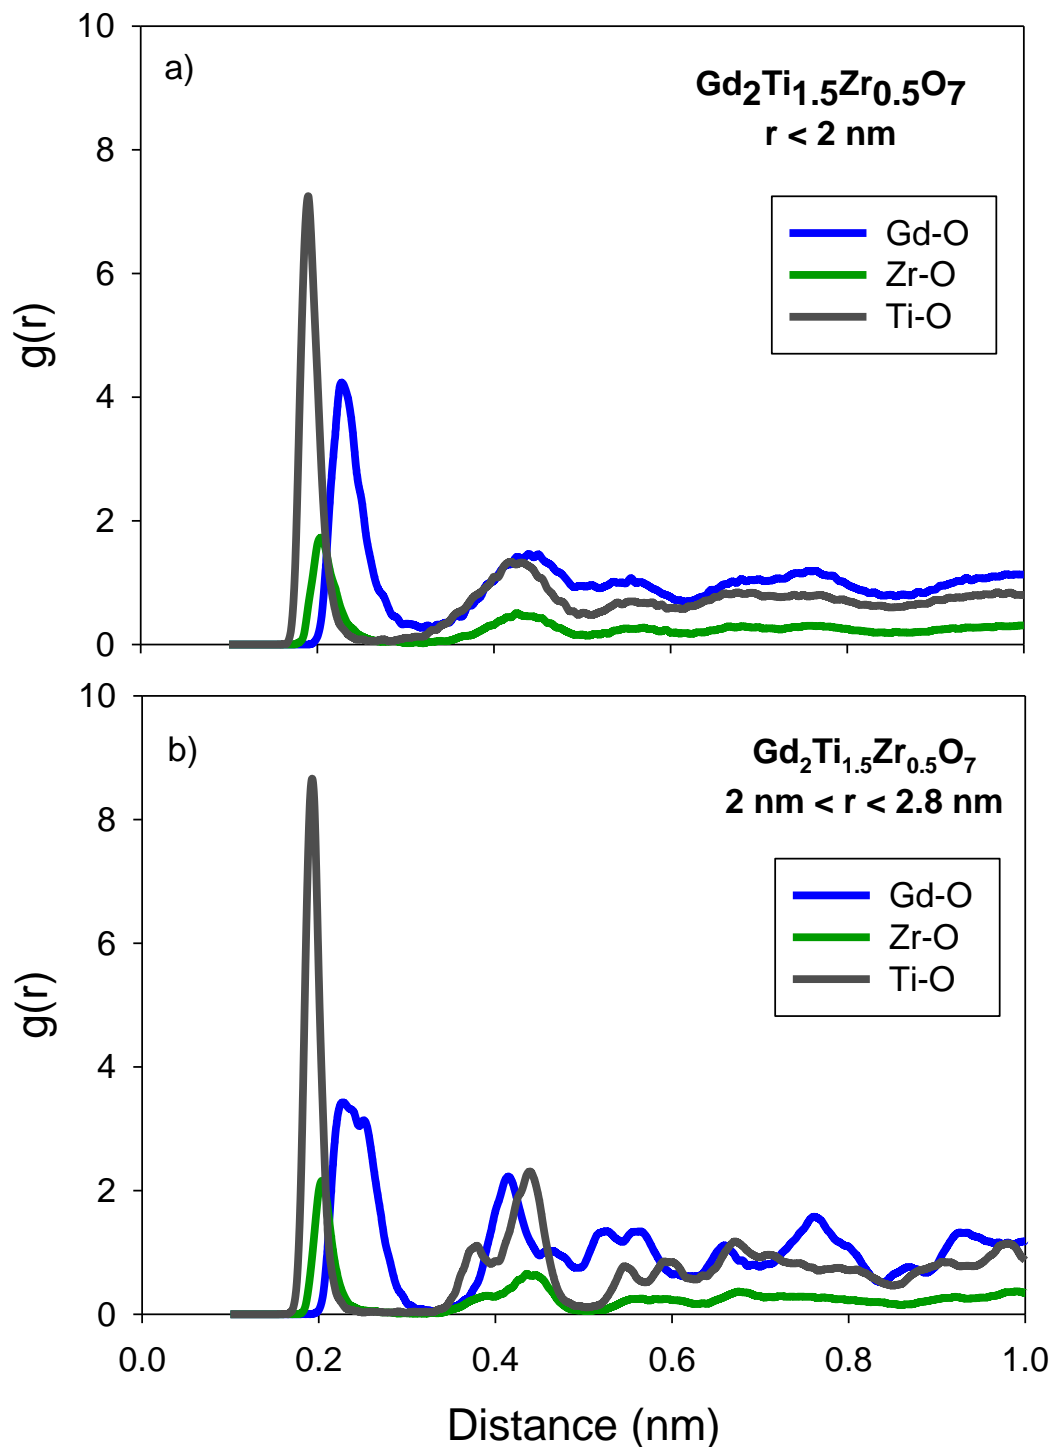

**Fig. S7** Radial distribution functions of Gd-O, Zr-O, and Ti-O pairs in a) the damage core and b) damage periphery in Gd<sub>2</sub>Ti<sub>1.5</sub>Zr<sub>0.5</sub>O<sub>7</sub> subjected to a thermal spike with energy deposition of 12 keV/nm at 300 K. The core is amorphous while the periphery shows broad peaks characteristic of disordered pyrochlore crystal.

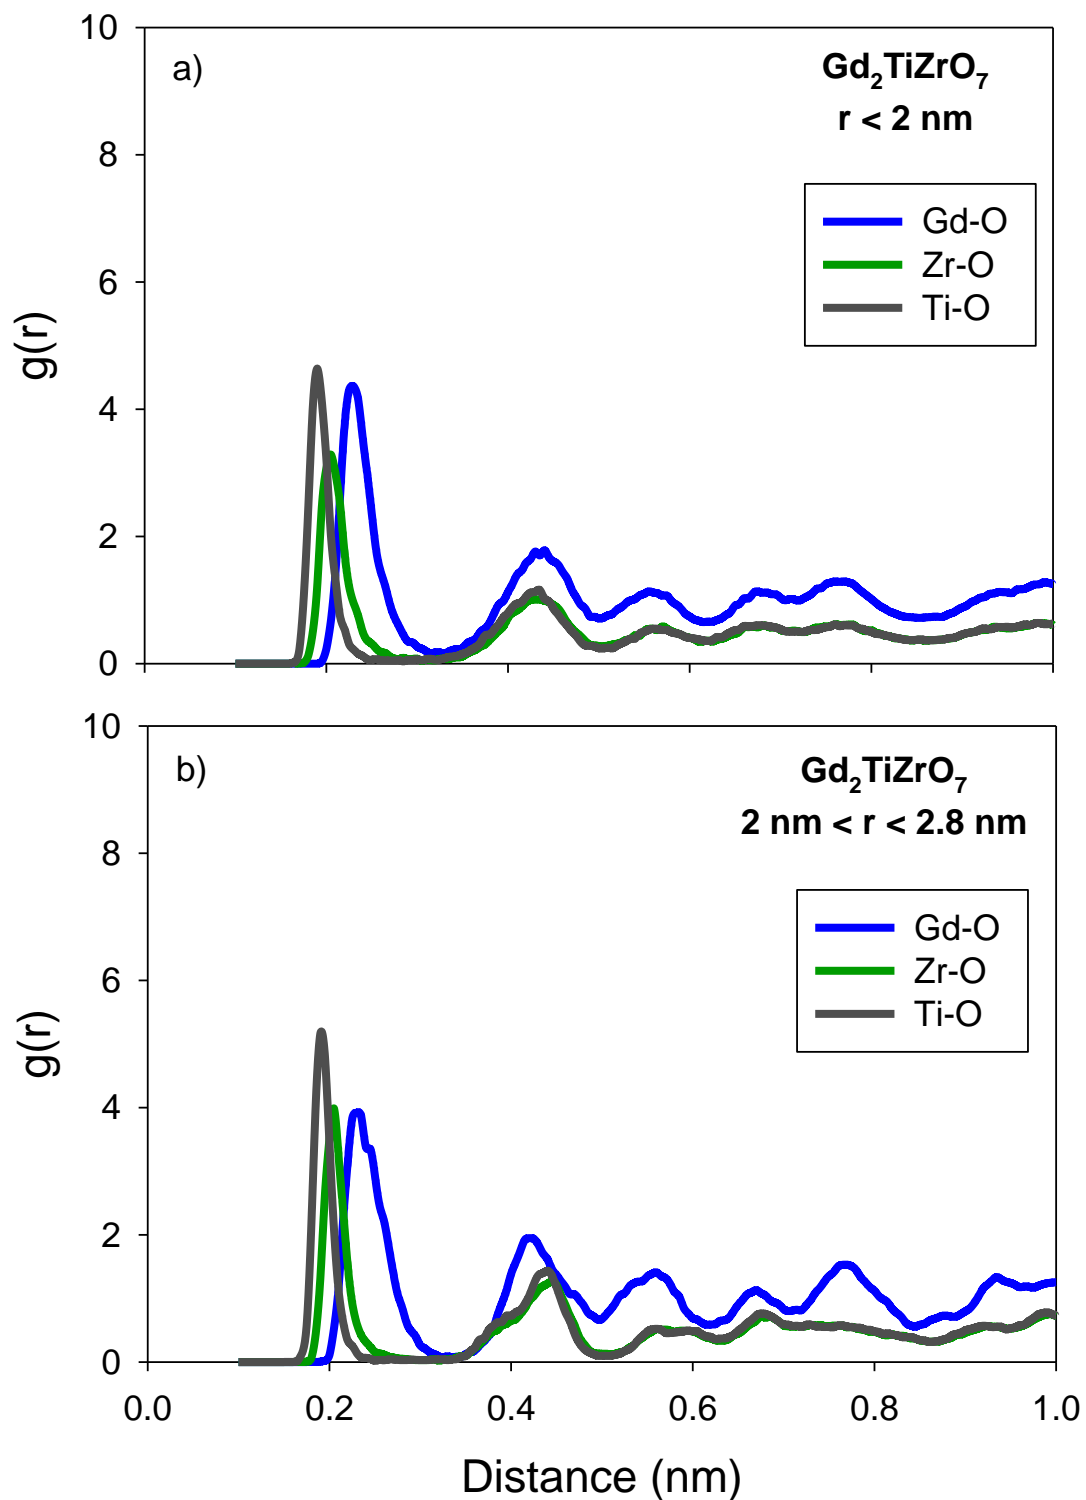

**Fig. S8** Radial distribution functions of Gd-O, Zr-O, and Ti-O pairs in a) the damage core and b) damage periphery in Gd<sub>2</sub>TiZrO<sub>7</sub> subjected to a thermal spike with energy deposition of 12 keV/nm at 300 K. These regions show peaks characteristic of the fluorite crystal.

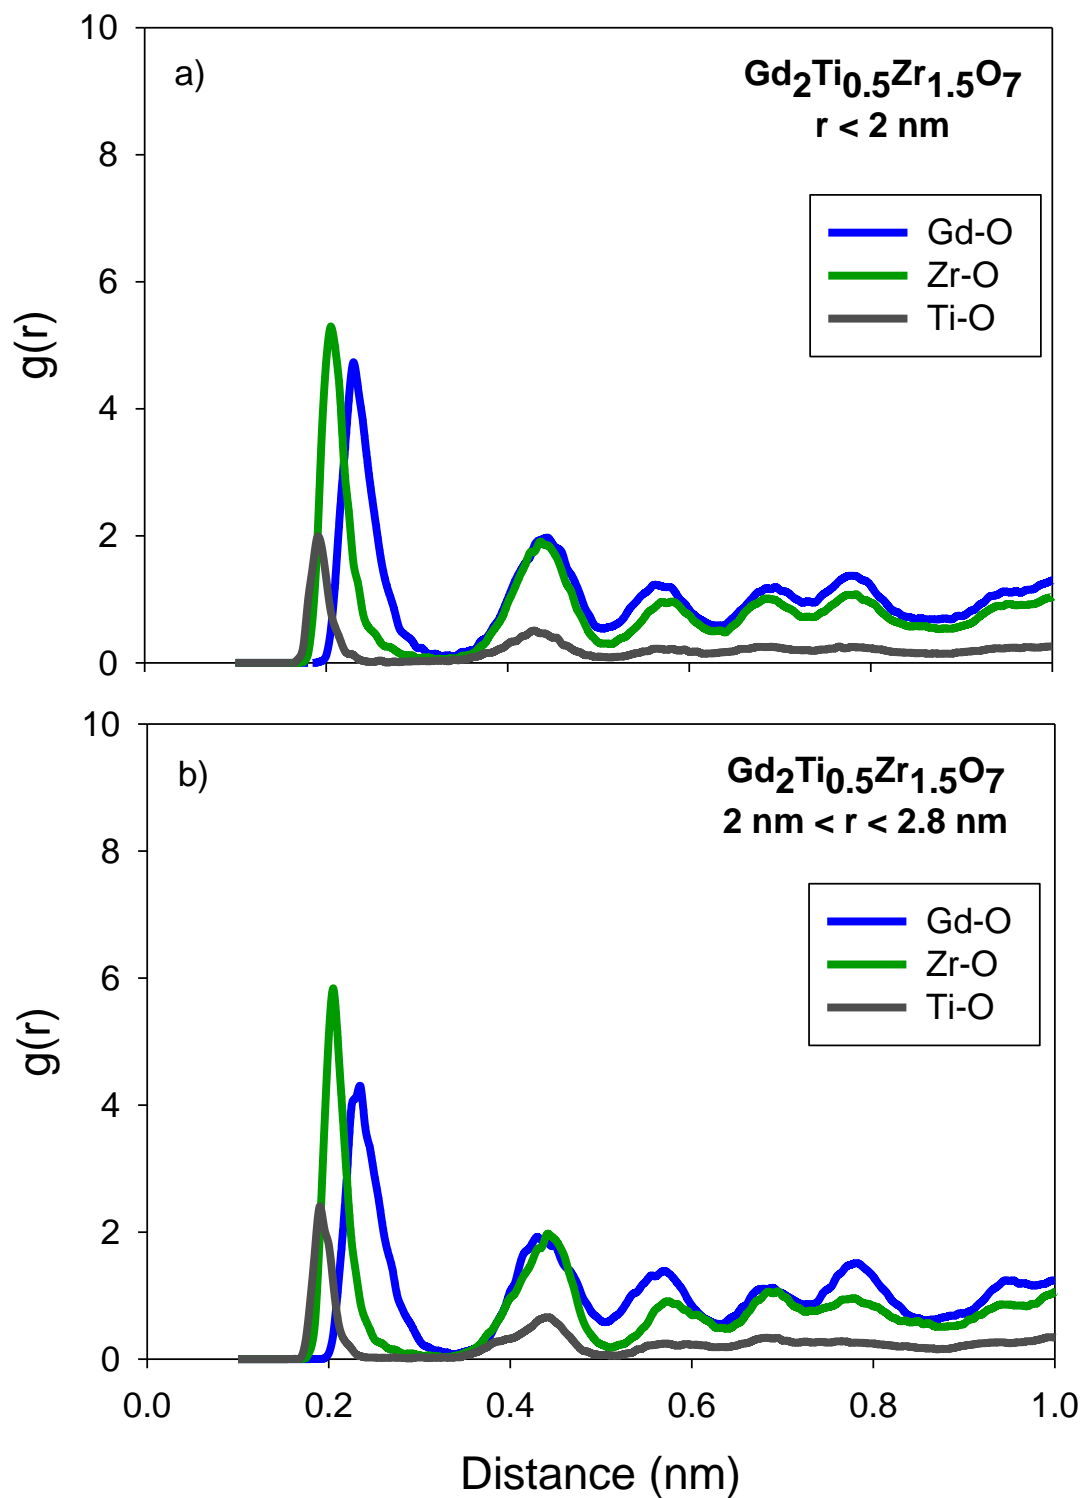

**Fig. S9** Radial distribution functions of Gd-O, Zr-O, and Ti-O pairs in a) the damage core and b) damage periphery in Gd<sub>2</sub>Ti<sub>0.5</sub>Zr<sub>1.5</sub>O<sub>7</sub> subjected to a thermal spike with energy deposition of 12 keV/nm at 300 K. These two regions show peaks characteristic of the fluorite crystal.



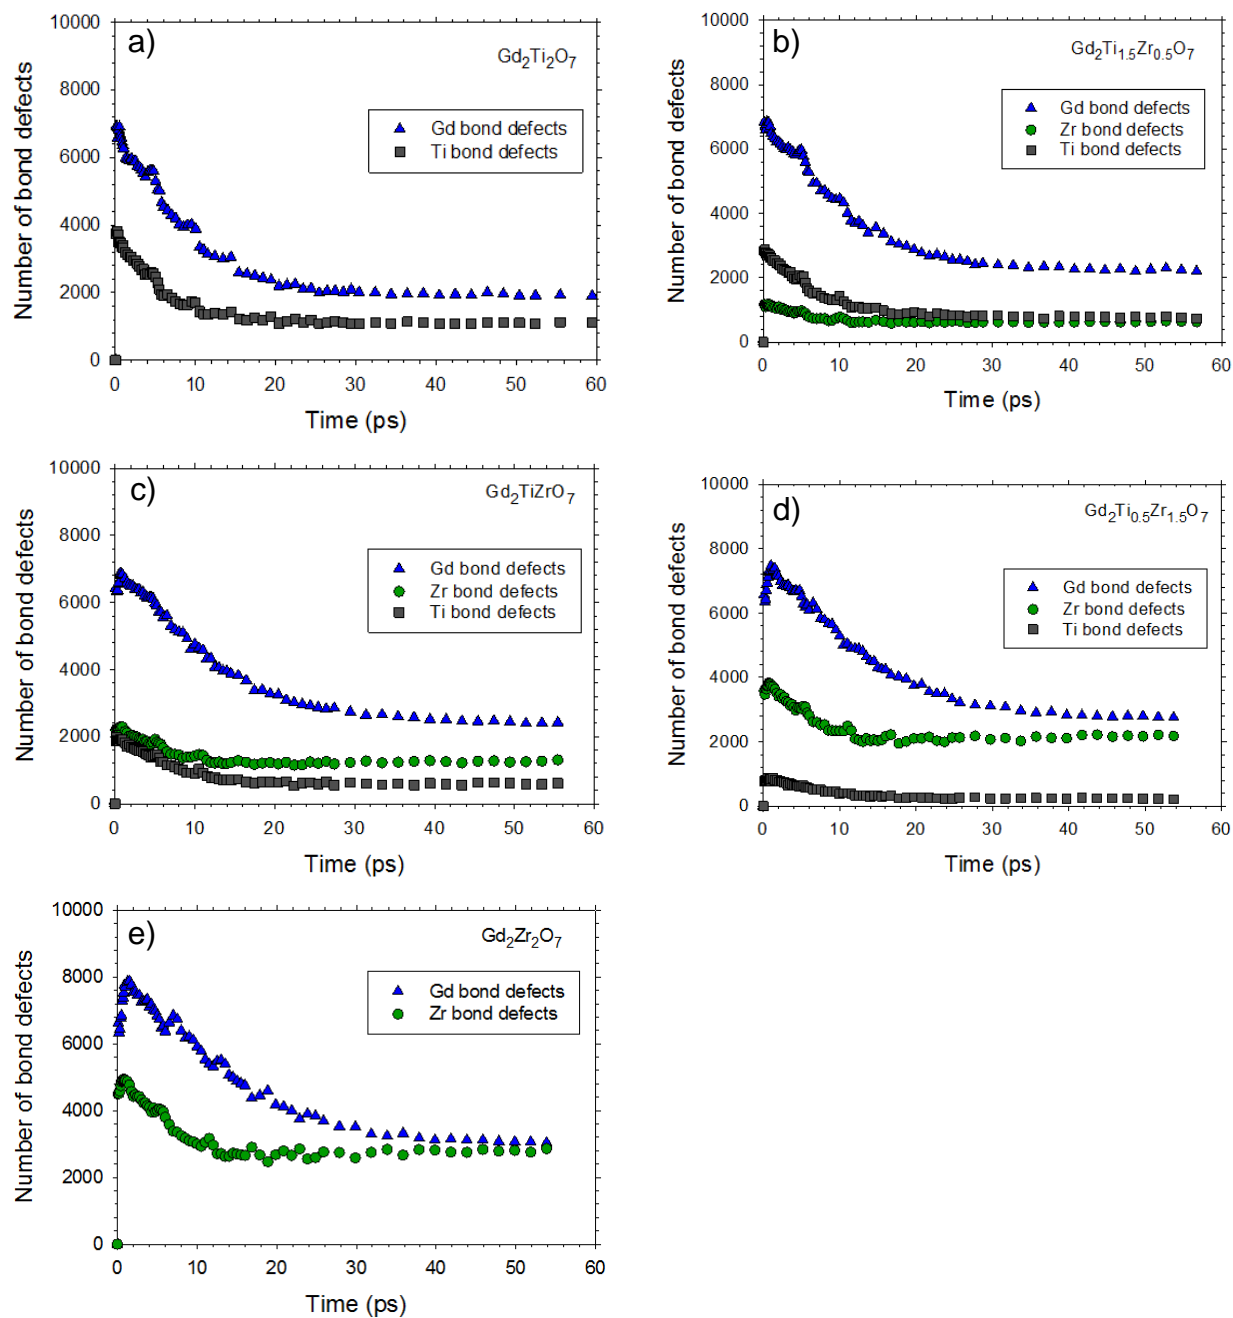

**Fig. S10** Evolution of Gd, Zr and Ti bond defects following a thermal spike with energy deposition of 12 keV/nm at 300 K in a)  $Gd_2Ti_2O_7$ ; b)  $Gd_2Ti_{1.5}Zr_{0.5}O_7$ ; c)  $Gd_2TiZrO_7$ ; d)  $Gd_2Ti_{0.5}Zr_{1.5}O_7$ ; and e)  $Gd_2Zr_2O_7$ .
